# Supplementary material for: Klotho as an Early Marker of Acute Kidney Injury Following Cardiac Surgery: A Systematic Review
Source: MDPI journal article supplement (doi:10.3390/jcdd11050135), 2024-04-28
Supplement: s1 [file s1]

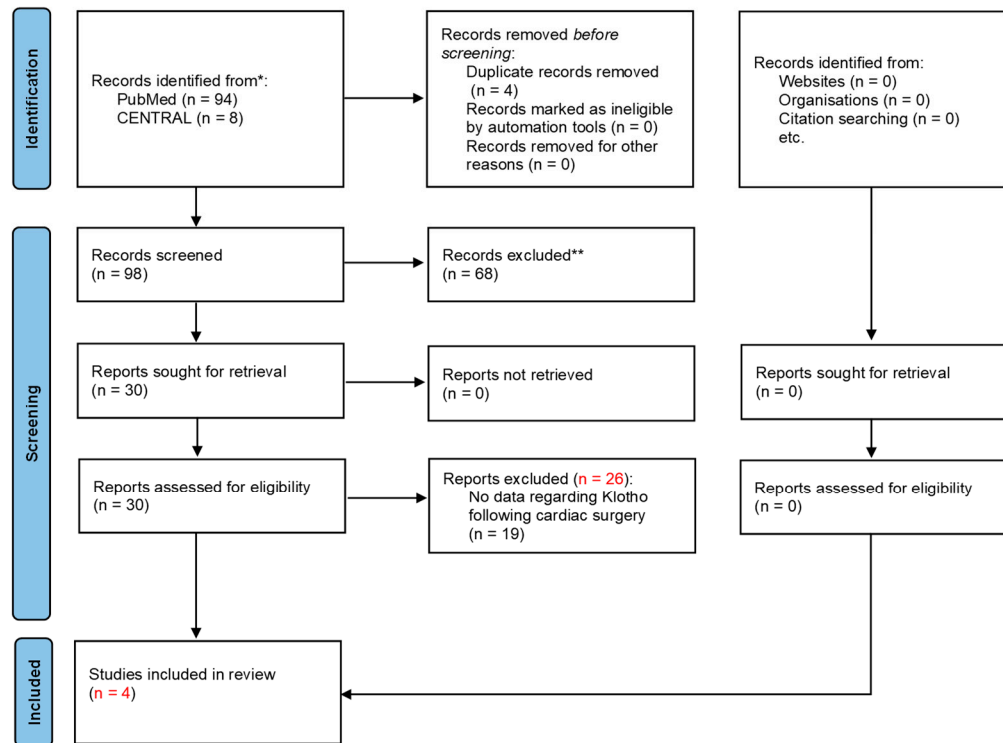

For more information, visit: <http://www.prisma-statement.org/>  
**Supplemental Figure S1. PRISMA flow diagram [36]**

**Supplemental Table S1.** Newcastle-Ottawa rating scale results for the included studies

| Study ID               | Representativeness | Selection of non-exposed | Ascertainment of exposure | Outcome not present at start | Comparability on major factor | Comparability on other factors | Assessment of outcome | Long enough follow-up | Adequacy of follow-up | Total score |
|------------------------|--------------------|--------------------------|---------------------------|------------------------------|-------------------------------|--------------------------------|-----------------------|-----------------------|-----------------------|-------------|
| Torregrosa 2015 [26]   | 1                  | 1                        | 1                         | 1                            | 1                             | 0                              | 1                     | 1                     | 1                     | 8           |
| Yong-Jun Liu 2015 [40] | 1                  | 1                        | 1                         | 1                            | 1                             | 0                              | 1                     | 1                     | 1                     | 8           |
| Yingying 2019 [27]     | 1                  | 1                        | 1                         | 1                            | 1                             | 0                              | 1                     | 1                     | 1                     | 8           |
| Ales Jerin 2020 [28]   | 1                  | 1                        | 1                         | 1                            | 1                             | 0                              | 1                     | 1                     | 1                     | 8           |

**Supplemental Table S2.** Comorbidities of included patients

| Study ID                        | Hypertension  |                | Dyslipidemia |                | Congestive heart failure |                | Peripheral artery disease |                | Cerebrovascular disease |                | Diabetes mellitus |                |
|---------------------------------|---------------|----------------|--------------|----------------|--------------------------|----------------|---------------------------|----------------|-------------------------|----------------|-------------------|----------------|
|                                 | <i>AKI</i>    | <i>Non-AKI</i> | <i>AKI</i>   | <i>Non-AKI</i> | <i>AKI</i>               | <i>Non-AKI</i> | <i>AKI</i>                | <i>Non-AKI</i> | <i>AKI</i>              | <i>Non-AKI</i> | <i>AKI</i>        | <i>Non-AKI</i> |
| Torregrosa et al., 2014 [26]    | NR            | NR             | NR           | NR             | NR                       | NR             | NR                        | NR             | NR                      | NR             | NR                | NR             |
| Yong-Jun Liu et al., 2015 [40]  | 4/19 (21.1%)  | 2/16 (12.5%)   | NR           | NR             | NR                       | NR             | NR                        | NR             | NR                      | NR             | 3/19 (15.7%)      | 1/16 (6.2%)    |
| Yingying Qian et al., 2019 [27] | 13/33 (39.4%) | 20/58 (34.5%)  | 1/33 (3.0%)  | 5/58 (8.6%)    | 7/33 (21.2%)             | 6/58 (10.3%)   | NR                        | NR             | 0/33 (0%)               | 4/58 (6.9%)    | 6/33 (18.1%)      | 8/58 (13.8%)   |

|                              |                   |                 |              |                |                 |                 |    |    |              |                |                  |                 |
|------------------------------|-------------------|-----------------|--------------|----------------|-----------------|-----------------|----|----|--------------|----------------|------------------|-----------------|
| Ales Jerin et al., 2020 [28] | 10/52<br>(19.2%)  | 6/26<br>(23.1%) | NR           | NR             | NR              | NR              | NR | NR | NR           | NR             | 16/52<br>(30.7%) | 9/26<br>(34.6%) |
| <b>Total</b>                 | 27/104<br>(25.9%) | 28/100<br>(28%) | 1/33<br>(3%) | 5/58<br>(8.6%) | 7/33<br>(21.2%) | 6/58<br>(10.3%) | NR | NR | 0/33<br>(0%) | 4/58<br>(6.9%) | 25/104<br>(24%)  | 18/100<br>(18%) |

*ID: identification; AKI: acute kidney injury; NR: not reported*
